# Supplementary material for: 4-Miktoarm star architecture induces PVDF β-phase formation in (PVDF)2-b-(PEO)2miktoarm star copolymers
Source: Royal Society of Chemistry journal article supplement (doi:10.1039/d0tc03192e), 2020-01-01
Supplement: d0tc03192e1.pdf [file d0tc03192e1.pdf]

***4-Miktoarm Star Architecture Induces PVDF  $\beta$ -phase formation in (PVDF)<sub>2</sub>-b-(PEO)<sub>2</sub> Miktoarm Star Copolymers***

Nicolás María<sup>†</sup>, Jon Maiz<sup>†,‡,||\*</sup>, Valentin Rodionov<sup>‡</sup>, Nikos Hadjichristidis<sup>#</sup>, Alejandro J. Müller<sup>†,||\*</sup>

<sup>†</sup>POLYMAT and Polymer Science and Technology Department, Faculty of Chemistry, University of the Basque Country UPV/EHU, Paseo Manuel Lardizábal 3, 20018, Donostia-San Sebastián, Spain

<sup>‡</sup>Centro de Física de Materiales (CFM) (CSIC–UPV/EHU) – Materials Physics Center (MPC), Paseo Manuel de Lardizabal 5, 20018 San Sebastián, Spain

<sup>||</sup>IKERBASQUE - Basque Foundation for Science, María Díaz de Haro 3, 48013 Bilbao, Spain

<sup>‡</sup>Department of Macromolecular Science and Engineering Case Western Reserve University, 2100 Adelbert Rd, Cleveland, OH 44106, USA

<sup>#</sup>Polymer Synthesis Laboratory, KAUST Catalysis Center, Physical Sciences and Engineering Division, King Abdullah University of Science and Technology (KAUST), Thuwal, Saudi Arabia.

**\*Corresponding authors:** [jon.maizs@ehu.eus](mailto:jon.maizs@ehu.eus); [alejandrojesus.muller@ehu.es](mailto:alejandrojesus.muller@ehu.es)

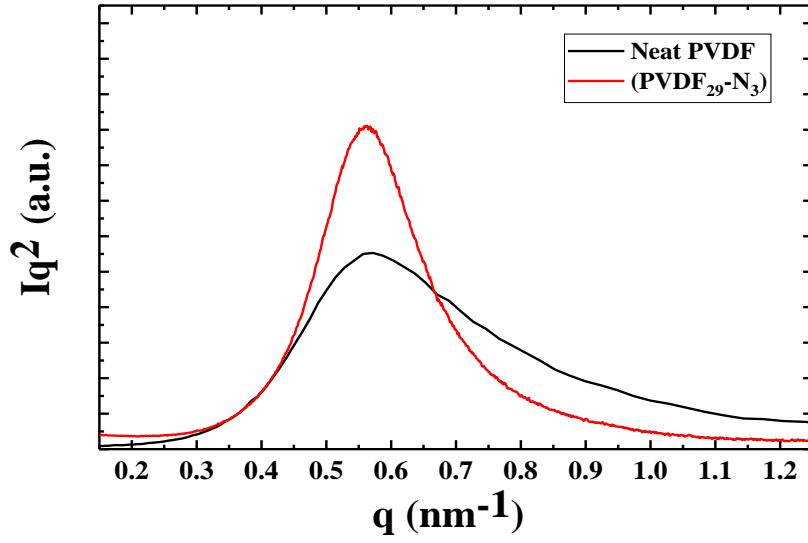

**Figure S1.** Lorentz-corrected SAXS patterns for neat PVDF and (PVDF<sub>29</sub>-N<sub>3</sub>)<sub>2</sub> sample.

The average lamellar thickness ( $l_c$ ) can be estimated by SAXS, as follows:

$$l_c = d^* x_v \quad (\text{SI1})$$

In Eq. (SI1),  $x_v$  is the crystalline volume fraction, which can be calculated using the relevant densities. In our case, the densities are not available, so we made a rough approximation and employed the weight fraction directly (*i.e.*,  $X_c$ ), obtained by DSC (see Table S1) according to:

$$l_c = d^* X_c \quad (\text{SI2})$$

The final values obtained for  $l_c$  from the SAXS patterns by Eq. (SI2) are listed in Table S1 for the neat PVDF and (PVDF<sub>29</sub>-N<sub>3</sub>)<sub>2</sub> sample.

**Table S1:** Comparison between DSC parameters related to the enthalpy ( $\Delta H_m$ ), crystallinity ( $X_c$ ), and the SAXS parameters related to the long period ( $d^*$ ) values and average lamellar thicknesses ( $l$ ) obtained for the studied PVDF samples.

|                                                    | DSC                |           | SAXS       |          |
|----------------------------------------------------|--------------------|-----------|------------|----------|
|                                                    | $\Delta H_m$ (J/g) | $X_c$ (%) | $d^*$ (nm) | $l$ (nm) |
| Neat PVDF                                          | 42.5               | 39.9      | 11.2       | 4.5      |
| (PVDF <sub>29</sub> -N <sub>3</sub> ) <sub>2</sub> | 56.8               | 53.3      | 11.2       | 6.0      |

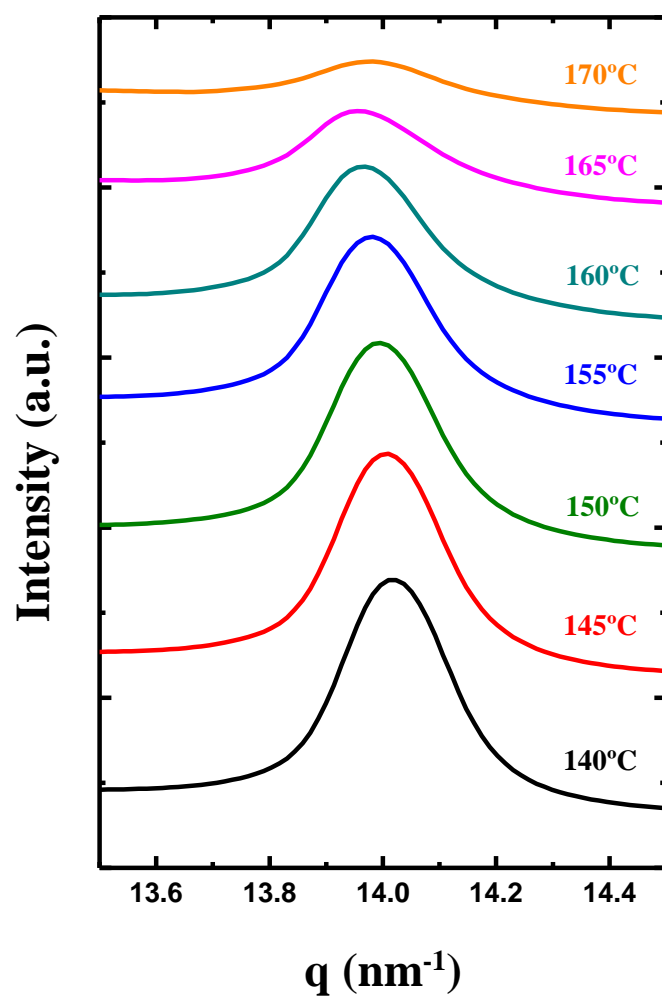

**Figure S2.** Evolution of the peak at  $14.1 \text{ nm}^{-1}$ , between 140-170°C, during the heating in WAXS diffraction of the (PVDF<sub>29</sub>-N<sub>3</sub>)<sub>2</sub> when the crystallization rate is 20°C/min.

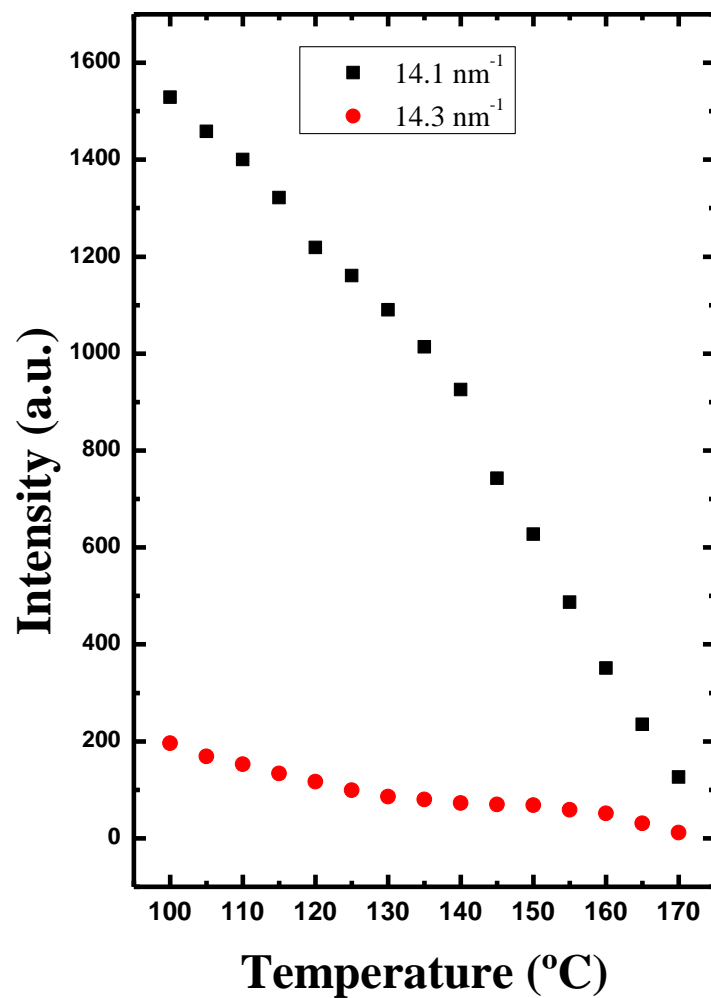

**Figure S3.** Evolution of the intensity of the peak at  $14.1 \text{ nm}^{-1}$  and the tail of this peak at  $14.3 \text{ nm}^{-1}$  during the heating in the WAXS analysis of the  $(\text{PVDF}_{29}\text{-N}_3)_2$  when the sample is cooled down at  $20^\circ\text{C}/\text{min}$ .
